# Supplementary material
Source: publisher figshare collection journal article supplement (https://acs.figshare.com/ndownloader/files/9659380)
Supplement: Supplementary file 1 [file 9659380]

**Supplementary Information for**  
**Non-Continuum Intercalated Water Diffusion Explains Fast**  
**Permeation through Graphene Oxide Membranes**

Shuping Jiao and Zhiping Xu\*

Applied Mechanics Laboratory, Department of Engineering Mechanics, and Center for  
Nano and Micro Mechanics, Tsinghua University, Beijing 100084, China

\*Email: [xuzp@tsinghua.edu.cn](mailto:xuzp@tsinghua.edu.cn)

This Supplementary Information Material contains

- Supplementary Figures S1-S7 and Captions

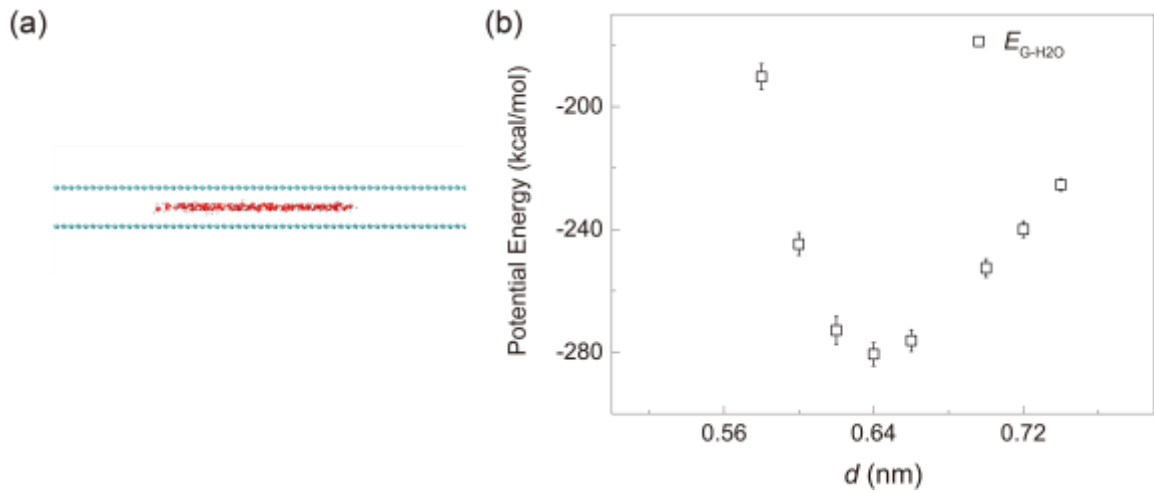

**Figure S1.** (a) The atomistic model with intercalated water ( $N_w = 115$ ) between two flat graphene sheets with an interlayer distance  $d$ , at 300 K. (b) The potential energy of intercalated water as a function of  $d$ , with a minimum around  $d = 0.65$  nm.

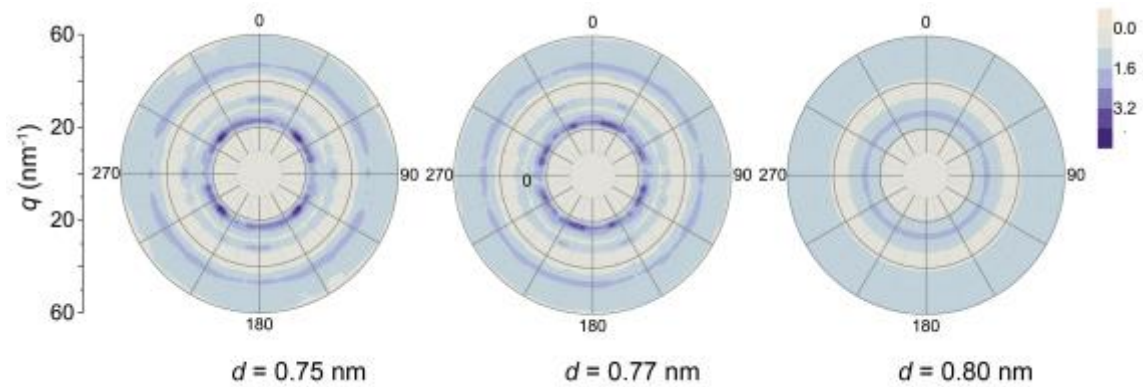

**Figure S2.** 2D structure factors of intercalated water between graphene layers, calculated at  $T = 300$  K,  $d = 0.75, 0.77, 0.8$  nm and  $N_w = 221$ .

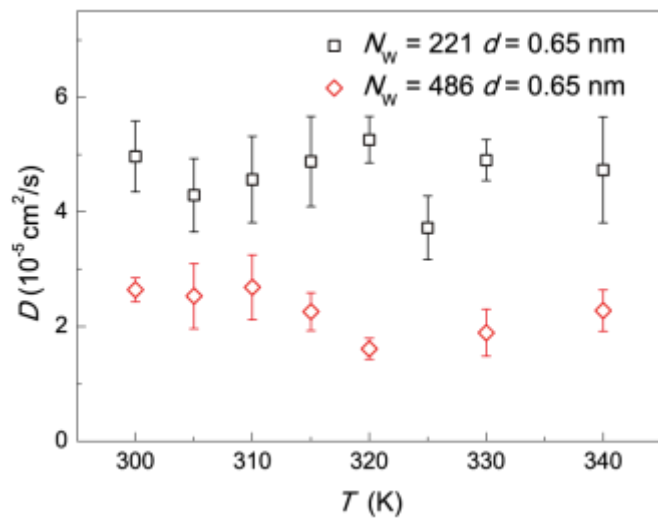

**Figure S3.** The dependence of collective diffusion coefficients  $D$  for the intercalated water on  $T$  with  $N_w = 221, 486$  and  $d = 0.65$  nm.

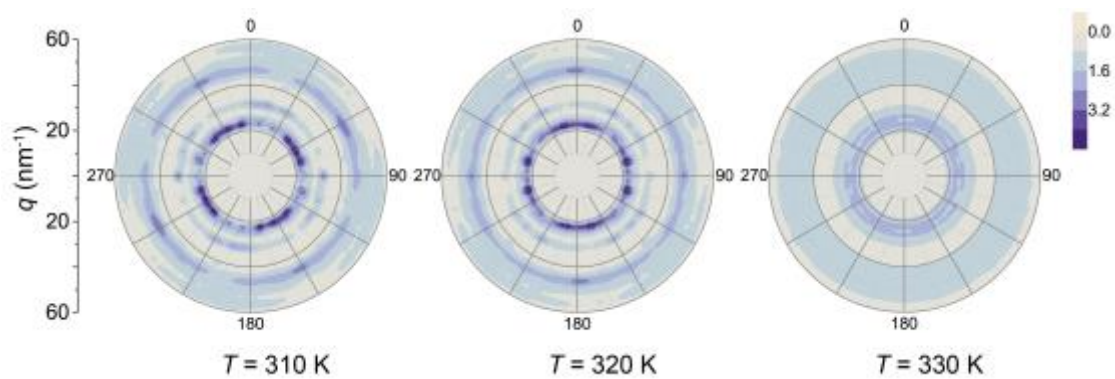

**Figure S4.** 2D structure factors of intercalated water between graphene layers, calculated at  $T = 310, 320, 330 \text{ K}$  at  $d = 0.65 \text{ nm}$  and  $N_w = 221$ .

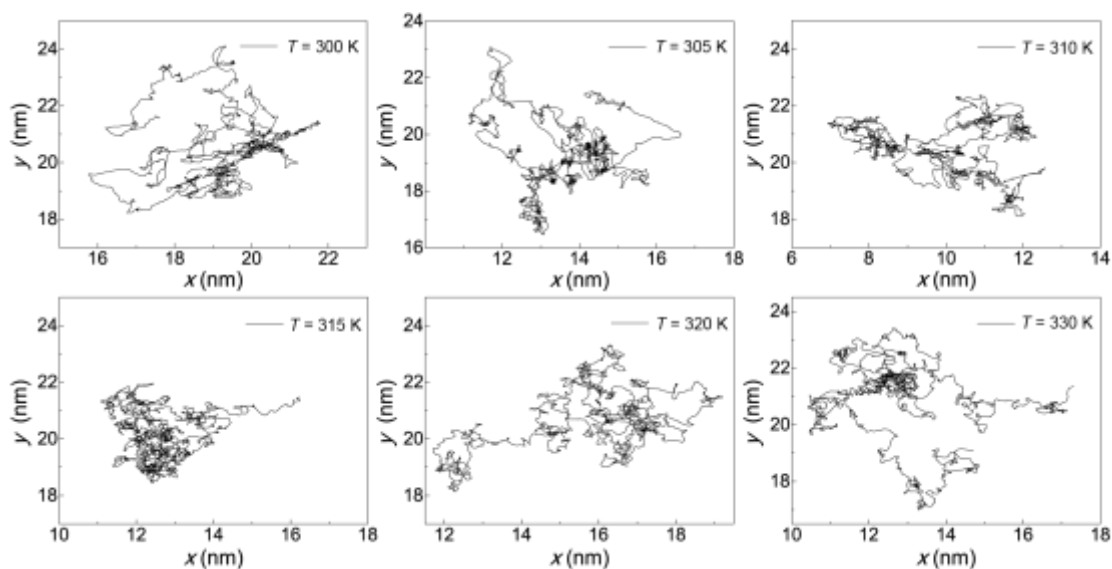

**Figure S5.** Center-of-mass trajectories of intercalated water in a 10 ns simulation, plotted with a time step of  $t_d = 10$  ps. The results show deviation from the Gaussian behavior at  $T$  below the solid-fluid transition temperature  $T_c = 315$  K. Above  $T_c$ , the Gaussian-like diffusion behavior is recovered.

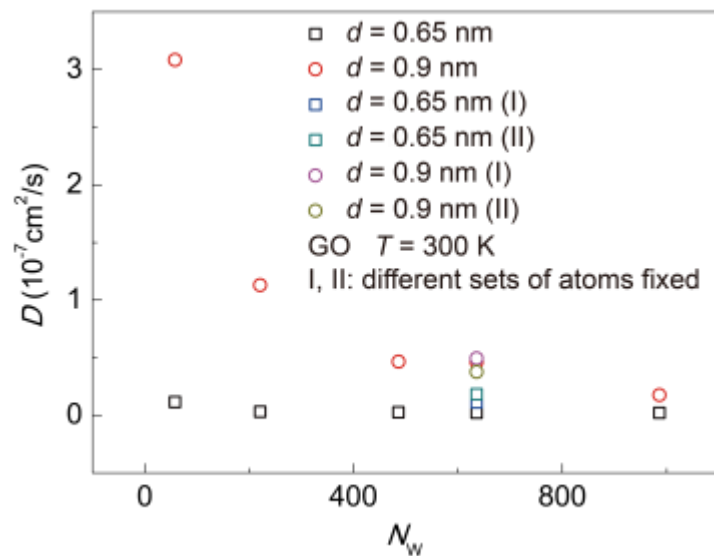

**Figure S6.** The dependence of  $D$  on  $N_w$  and compare results of the structure with partial carbon atoms (three of them are chosen from the sample randomly) fixed at  $d = 0.65$  nm,  $d = 0.9$  nm and  $T = 300$  K.

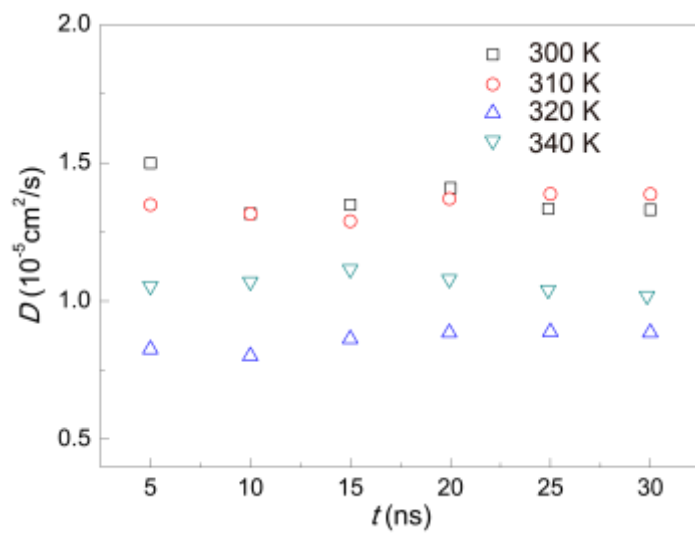

**Figure S7.** The convergence of collective diffusion coefficients  $D$  over simulation time at different temperature with  $N_w = 986$ ,  $d = 0.65$  nm.
